# Supplementary material
Source: Copernicus journal article supplement (doi:10.5194/egusphere-2026-2746)
Supplement: Supplementary file 1 [file egusphere-2026-2746-supplement.pdf]

## Supplementary Material: ENSO Modulation of PM<sub>2.5</sub> air pollution in Central Kalimantan, Indonesia revealed by a dense network of Purple Air sensors

### 1. Sensor Network

#### 1.1 Sensor Network 2023

**Table S1.** Purple Air monitors used to provide long-term PM<sub>2.5</sub> monitoring across Central Kalimantan, Indonesia between August 2023 and January 2025, used in this analysis. Anonymous sensor names are provided, their location, and the sensor ID for the outdoor sensor at each location. In addition, information is included on the location type and building type. Sites are coloured by location type (green: rural, grey: urban, blue: remote).

| Sensor Name | Location       | Outdoor Sensor ID                                               | Location Type | Building Type |
|-------------|----------------|-----------------------------------------------------------------|---------------|---------------|
| PLK_01      | Palangkaraya   | Kali_01                                                         | Urban         | Household     |
| KR_05       | Kereng         | Kali_08                                                         | Urban         | Hospital      |
| TT_03       | Tanjung Taruna | Kali_05                                                         | Rural         | Household     |
| SBG_01      | Sebangau       | Kali_07<br><i>(replaced with<br/>Kali_34 on<br/>08/10/2024)</i> | Remote        | -             |

## Sensor Network Map 2023

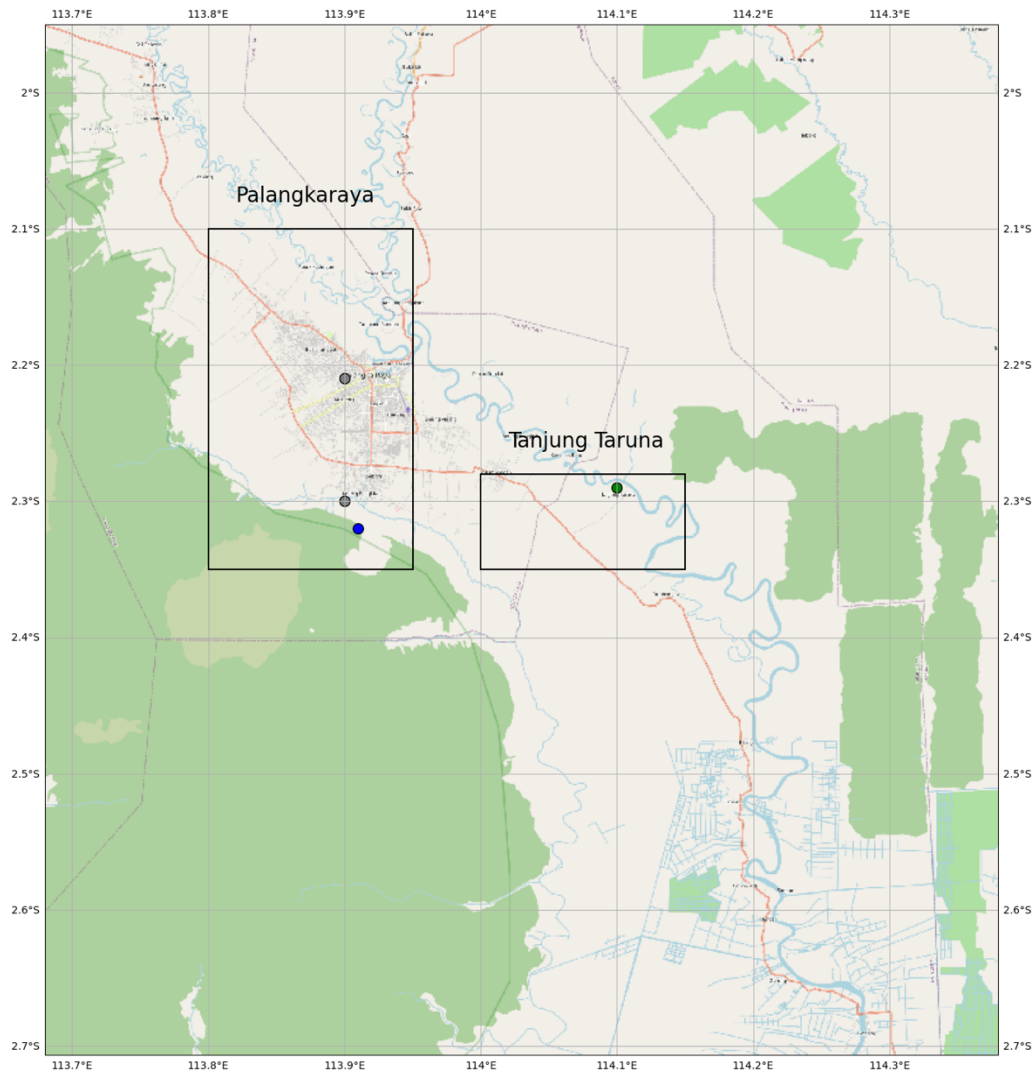

**Figure S1.** Map of long-term Purple Air sensor locations (a) across Pulang Pisau, Central Kalimantan between 2023 and 2024. Locations for Purple Air sensor in Palangkaraya and Tanjung Taruna are highlighted. Sites are coloured by site type (urban: grey, rural: green and remote: blue). Latitude and longitude of locations have been limited to two decimal places to maintain volunteer anonymity.

## 1.2 Sensor Network 2024

**Table S2.** Outdoor Purple Air monitors deployed across Central Kalimantan, Indonesia between June 2024 and January 2025, used in this analysis. Anonymous sensor names are provided, their location, and the sensor ID for the outdoor sensor at each location. In addition, information is included on the location type, and building type. Sites are coloured by location type (green: rural, grey: urban, blue: remote).

| 1. Sensor Name | Location     | Sensor ID outdoor           | Location Type | Building Type                            | notes                 |
|----------------|--------------|-----------------------------|---------------|------------------------------------------|-----------------------|
| 2. PLK_01      | Palangkaraya | Kali_01                     | Urban         | Household                                |                       |
| 3. PLK_02      | Palangkaraya | Kali_90                     | Urban         | Household                                |                       |
| 4. PLK_04      | Palangkaraya | Kali_82                     | Urban         | Household                                |                       |
| 5. PLK_05      | Palangkaraya | Kali_46                     | Urban         | Hotel                                    |                       |
| 6. PLK_06      | Palangkaraya | Kali_106                    | Urban         | School                                   |                       |
| 7. PLK_07      | Palangkaraya | Kali_20                     | Urban         | Household                                |                       |
| 8. PLK_08      | Palangkaraya | Kali_18                     | Urban         | Household                                |                       |
| 9. PLK_09      | Palangkaraya | Kali_114                    | Urban         | Office                                   |                       |
| 10. PLK_10     | Palangkaraya | Kali_23, Kali_111, Kali_112 | Urban         | Reference Monitor Site (for collocation) | Not used in analysis* |
| 11. PLK_12     | Palangkaraya | Kali_76                     | Urban         | Household                                |                       |
| 12. PLK_14     | Palangkaraya | Kali_102                    | Urban         | University Dormitory                     |                       |
| 13. PLK_15     | Palangkaraya | Kali_105                    | Urban         | Hotel                                    |                       |
| 14. PLK_16     | Palangkaraya | Kali_110                    | Urban         | Household                                |                       |
| 15. PLK_17     | Palangkaraya | Kali_36                     | Urban         | Office                                   |                       |
| 16. PLK_19     | Palangkaraya | Kali_98                     | Urban         | Office                                   |                       |
| 17. PLK_21     | Palangkaraya | Kali_41                     | Urban         | Household                                |                       |
| 18. PLK_23     | Palangkaraya | Kali_39                     | Urban         | Office                                   |                       |
| 19. PLK_26     | Palangkaraya | Kali_11                     | Urban         | Household                                |                       |
| 20. PLK_27     | Palangkaraya | Kali_13                     | Urban         | Office                                   |                       |
| 21. PLK_29     | Palangkaraya | Kali_48                     | Urban         | University Teaching Building             |                       |
| 22. PLK_30     | Palangkaraya | Kali_42                     | Urban         | Hospital                                 |                       |
| 23. KR_05      | Kereng       | Kali_08                     | Urban         | Hospital                                 |                       |
| 24. KR_07      | Kereng       | Kali_96                     | Urban         | School                                   |                       |

|            |                |                               |        |           |                                                |
|------------|----------------|-------------------------------|--------|-----------|------------------------------------------------|
| 25. KR_08  | Kereng         | Kali_94                       | Urban  | Household |                                                |
| 26. KR_09  | Kereng         | Kali_92                       | Urban  | Household |                                                |
| 27. KR_10  | Kereng         | Kali_88                       | Urban  | Household |                                                |
| 28. KR_11  | Kereng         | Kali_31                       | Urban  | Household |                                                |
| 29. TT_03  | Tanjung Taruna | Kali_05                       | Rural  | Household |                                                |
| 30. TT_08  | Tanjung Taruna | Kali_78                       | Rural  | Household |                                                |
| 31. TT_09  | Tanjung Taruna | Kali_74                       | Rural  | Office    |                                                |
| 32. TT_11  | Tanjung Taruna | Kali_29                       | Rural  | School    |                                                |
| 33. TT_12  | Tanjung Taruna | Kali_86                       | Rural  | Household |                                                |
| 34. TT_13  | Tanjung Taruna | Kali_27                       | Rural  | Household |                                                |
| 35. TT_14  | Tanjung Taruna | Kali_25                       | Rural  | Household |                                                |
| 36. TTH_02 | Tumbang Tahai  | Kali_54                       | Rural  | Office    |                                                |
| 37. TTH_03 | Tumbang Tahai  | Kali_56                       | Rural  | School    |                                                |
| 38. TTH_04 | Tumbang Tahai  | Kali_52                       | Rural  | School    |                                                |
| 39. TTH_05 | Tumbang Tahai  | Kali_63                       | Rural  | Household |                                                |
| 40. TTH_07 | Tumbang Tahai  | Kali_67                       | Rural  | Household |                                                |
| 41. TTH_08 | Tumbang Tahai  | Kali_65                       | Rural  | Household |                                                |
| 42. TTH_09 | Tumbang Tahai  | Kali_16                       | Rural  | Household |                                                |
| 43. GH_02  | Gohong         | Kali_108                      | Rural  | Office    |                                                |
| 44. GH_03  | Gohong         | Kali_22                       | Rural  | School    |                                                |
| 45. BR_01  | Bukit Raya     | Kali_72                       | Urban  | Household |                                                |
| 46. SBG_01 | Sebangau       | Kali_07<br>(replaced with 34) | Remote | Sebangau  | Kali_07 replaced with<br>Kali_34 on 08.10.2024 |

## Sensor Network Map 2024

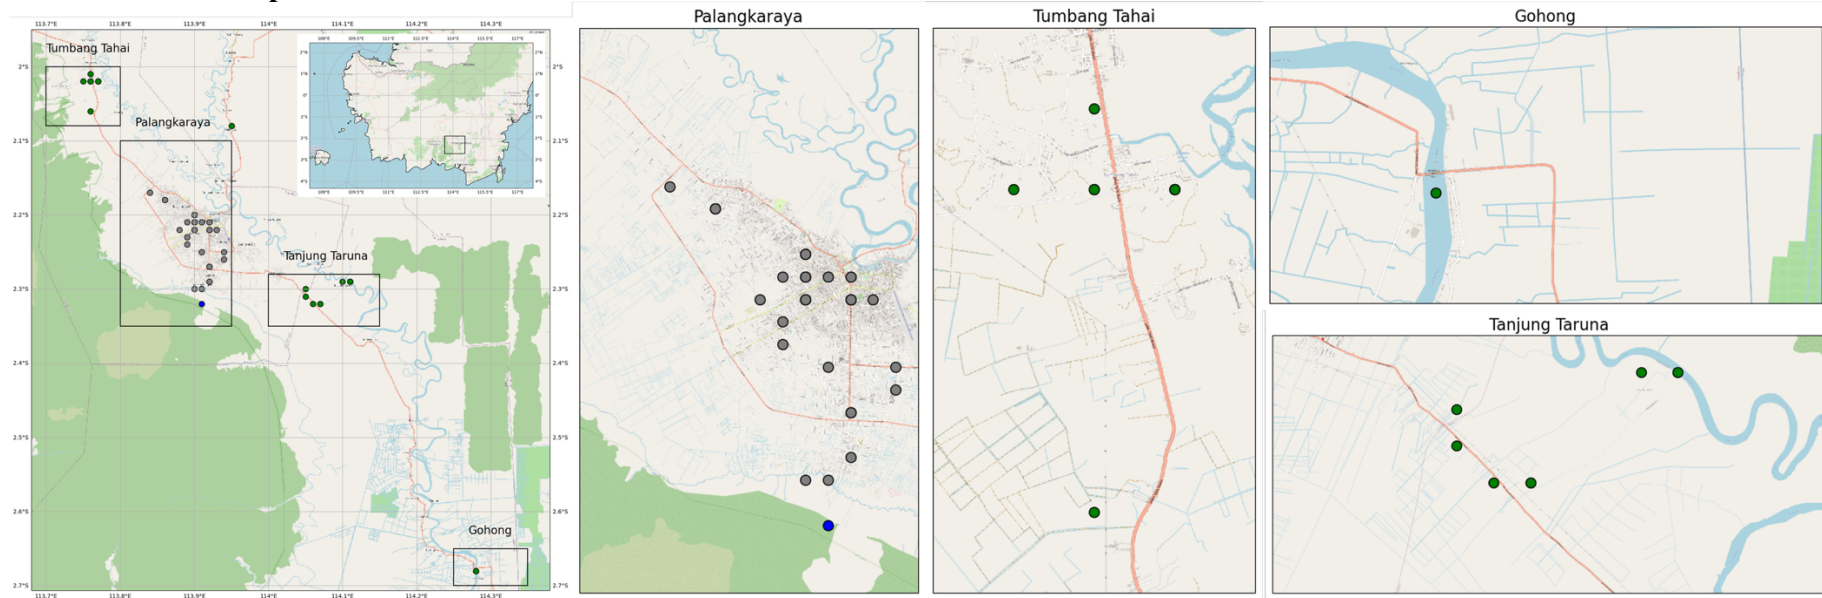

**Figure S2.** Map of Purple Air sensor locations (a) across Pulang Pisau, Central Kalimantan, with individual locations included in this study marked on, and named, for reference. Map inset indicates location of study region in Borneo. Locations and volunteer codes for Purple Air sensor in (b) Palangkaraya (c) Tumbang Tahai (d) Tanjung Taruna and (e) Gohong, as marked locations on (a). In (a) – (e) sites are coloured by site type (urban: grey, rural: green and remote: blue). Latitude and longitude of locations have been limited to two decimal places to maintain volunteer anonymity.

### 1.3 Sensor Network 2025

**Table S3.** Purple Air monitors deployed across Central Kalimantan, Indonesia between February 2025 and October 2025. Anonymous sensor names are provided, their location, and the sensor ID for the outdoor sensor at each location. In addition, information is included on the location type and building type. Sites are coloured by location type (grey: urban, blue: remote).

| Sensor Name | Location     | Outdoor Sensor ID                                       | Location Type | Building Type         |
|-------------|--------------|---------------------------------------------------------|---------------|-----------------------|
| PLK_04      | Palangkaraya | Kali_82                                                 | Urban         | Household             |
| PLK_07      | Palangkaraya | Kali_20                                                 | Urban         | Household             |
| PLK_17      | Palangkaraya | Kali_36                                                 | Urban         | Office (DLH)          |
| PLK_19      | Palangkaraya | Kali_97                                                 | Urban         | Office (Fire Station) |
| SBG_01      | Sebangau     | Kali_07<br><i>(replaced with Kali_34 on 08/10/2024)</i> | Remote        | -                     |
| MB_01       | Mungku Baru  | Kali_70                                                 | Remote        | Household             |

**Sensor Network Map 2025**

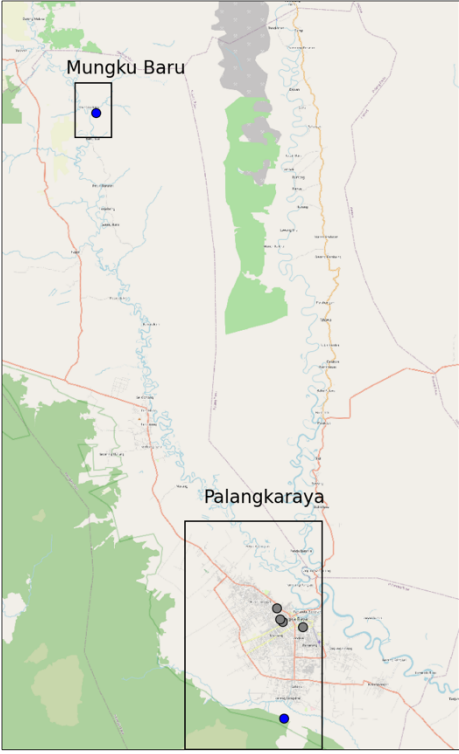

Palangkaraya

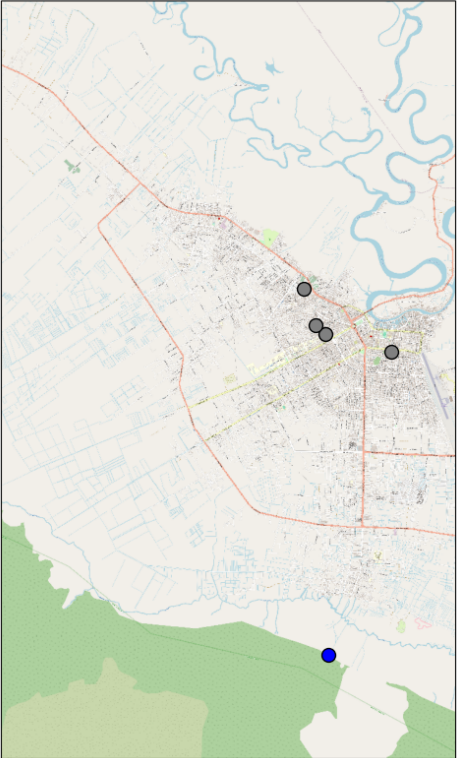

Mungku Baru

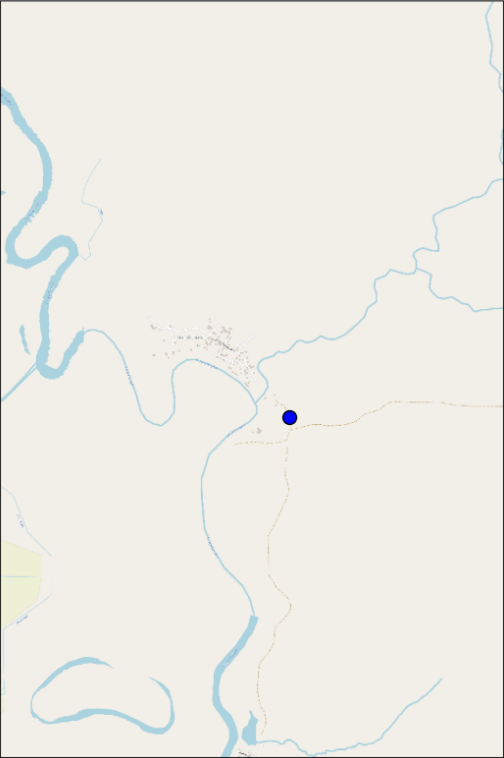

**Figure S3.** Map of Purple Air sensor locations across Pulang Pisau, Central Kalimantan in 2025. Locations for Purple Air sensor in Palangkaraya and Mungku Baru are highlighted. Sites are coloured by site type (urban: grey, rural: green and remote: blue). Latitude and longitude of locations have been limited to two decimal places to maintain volunteer anonymity.

## 2. Relative Humidity Adjustment of Sensors

We collocated 3 Purple Air sensors with a reference grade air quality monitor at the Indonesian Ministry of Environment and Forestry (KLHK) in Palangkaraya for the period July 1<sup>st</sup> 2024 to January 8<sup>th</sup> 2025. The reference grade sensor used is the Horiba Air Pollution Dust Analyzer (APDA) as the FRM (HORIBA) for PM<sub>2.5</sub> monitoring (Kurniawati et al., 2024). Beta-ray attenuation is used to measure PM<sub>2.5</sub> concentrations. While hourly measurements are taken, data is only provided at daily-mean time resolution. There is no documentation available on data quality procedures.

We compare daily-mean concentrations from the 3 Purple Air sensors (sensor\_names: kali\_111, kali\_112, kali\_23) with daily mean concentrations from the reference grade sensor for the period July 1<sup>st</sup> 2024 to January 8<sup>th</sup> 2025. Without adjustment, the Purple Air sensors capture variability well ( $r=0.84$ ) but overestimate concentrations (NMBF=0.75, NMAE=0.77, RMSE=37.2), most likely due to high ambient RH in the region. We utilise the most studied method for correction of low-cost sensors and use multiple linear regression (MLR) (McFarlane et al., 2021, Mattheiu-Campbell et al., 2024, Barkjohn et al., 2021). We choose this method due to its simple, transparent nature. We choose to only consider RH (Equation S1), as several studies have found this to improve Purple Air performance (McFarlane et al., 2021, Mattheiu-Campbell et al., 2024, Barkjohn et al., 2021). While some single-site studies have found temperature improves PM<sub>2.5</sub> prediction, there is no known mechanism for temperature influencing light scattering so we do not consider this in our adjustment.

$$\text{corrected PM}_{2.5} (cf_1) = a_1 \times \text{PM}_{2.5} (cf_1) + a_2 \times \text{RH} + i \quad (\text{S1})$$

$$a_1 = 0.49441527 \quad a_2 = -0.06550617 \quad i = 3.1348177901293326$$

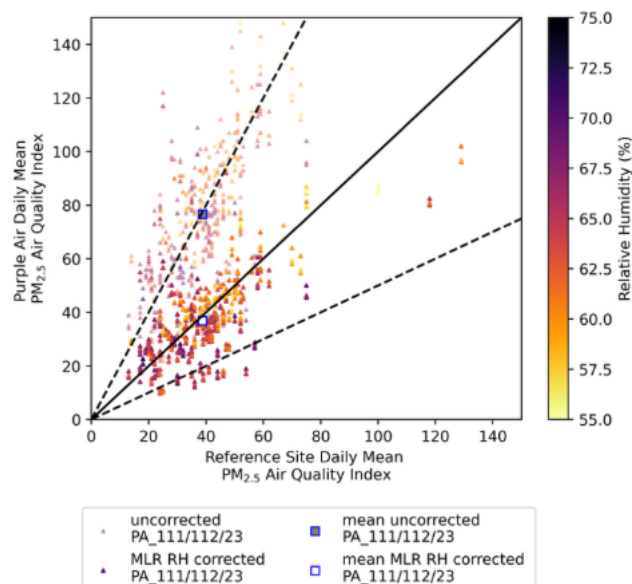

**Figure S4.** (a) Comparison of daily mean PM<sub>2.5</sub> Air Quality Index data from reference site and Purple Air sensors (sensor names: kali\_111, kali\_112, kali\_23). Data are shown before (uncorrected: transparent) and after applying a linear correction including relative humidity

(RH) (corrected: solid colours), as a function of RH. The mean concentration across all days is indicated by the coloured squares with blue border (grey: uncorrected, white: corrected).

The MLR model we use is in Equation 1.  $a_1$  and  $a_2$  are the fitted model coefficients,  $PM_{2.5(cf\_1)}$  is the daily mean  $PM_{2.5(cf\_1)}$ , RH is the relative humidity (in %, measured by the PurpleAir sensors), and  $i$  is the fitted model intercept.

We randomly select 70% of available data for training of the MLR model but weight selection by the bias to observations. The model regressor score is 0.69. We find that including an additive RH term (Equation S1) improves Purple Air performance substantially ( $r= 0.89$ ,  $NMBF=0.02$ ,  $NMAE=0.17$ ,  $RMSE=10.5$ ) (Figure S2). Therefore, we use Equation 1 to correct hourly and daily data from all 110 Purple Air sensors in this work.

### 3. PM<sub>2.5</sub> Concentrations

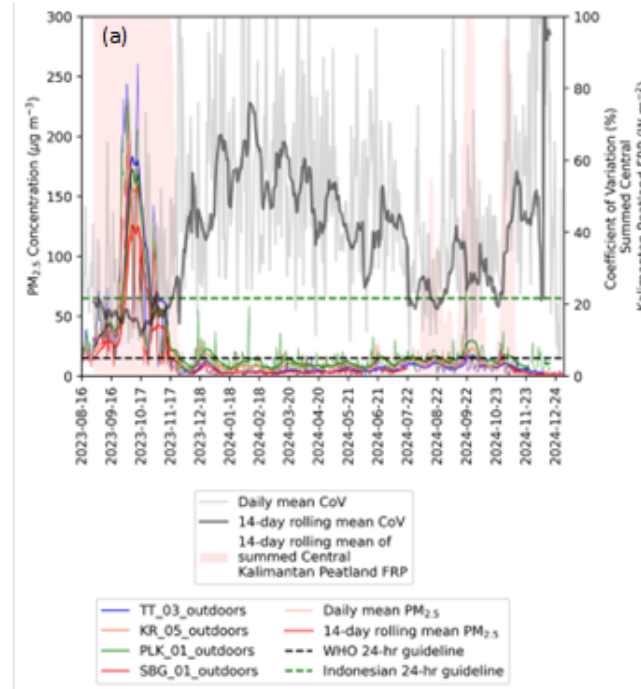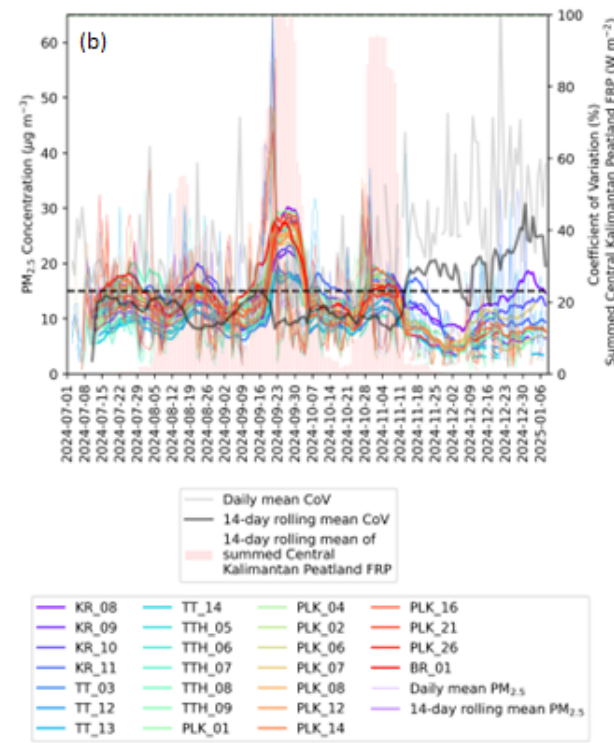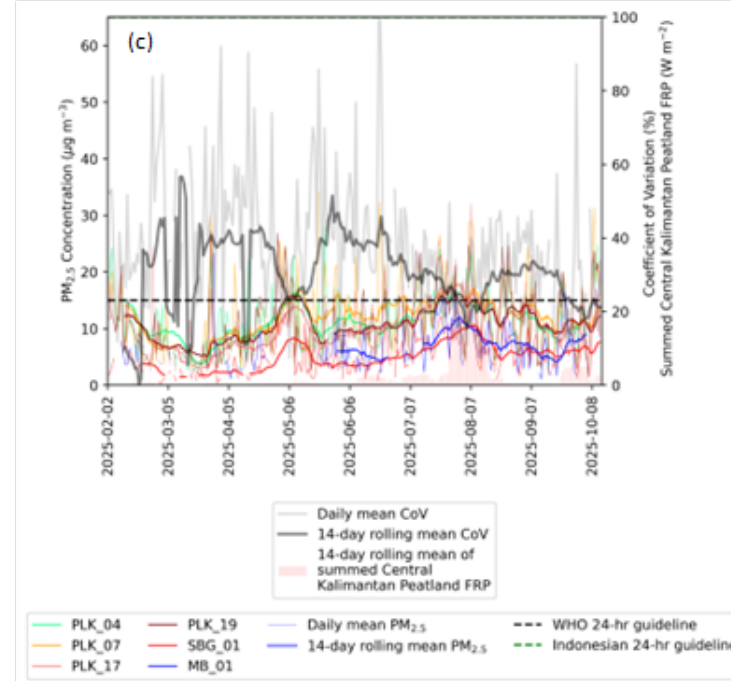

**Figure S5.** Timeseries of outdoor PM<sub>2.5</sub> concentrations in (a) Tanjung Taruna (TT\_03), Kereng (KR\_05), Palangkaraya (PLK\_01) and Sebangau (SBG\_01) sites between August 16<sup>th</sup> 2023 and January 1<sup>st</sup> 2025, (b) Kereng (KR\_##), Tanjung Taruna (TT\_##), Tumbang Tahai (TTH\_##), Palangkaraya (PLK\_##) and Bukit Rawi (BR\_01) sites between July 1<sup>st</sup> 2024 and January 8<sup>th</sup> 2025 and (c) Palangkaraya (PLK\_##), Sebangau (SBG\_##) and Munkgu Baru (MB\_##) sites between February 2<sup>nd</sup> 2025 and October 12<sup>th</sup> 2025. Daily mean (thin line) and rolling 14-day mean (thick line) PM<sub>2.5</sub> concentrations are shown for each site. The World Health Organisation (WHO) (dashed black line) and the Indonesian (dashed green line) 24-hour guideline PM<sub>2.5</sub> concentrations (15 µg m<sup>-3</sup> and 65 µg m<sup>-3</sup>, respectively) are included for reference. The daily mean (thin line) and 14-day rolling mean (thick line) coefficient of variation (CoV) and 14-day rolling mean of summed Central Kalimantan Peatland fire radiative power (FRP) from VIIRS (red bars) are also shown.
